# Supplementary material for: Transcription factor SP1 regulates haptoglobin fucosylation via induction of GDP-fucose transporter 1 in the hepatoma cell line HepG2
Source: PubMed Central journal article supplement (PMC9615130; doi:10.1016/j.bbrep.2022.101372), 2022-10-25
Supplement: mmc2.pdf [file mmc2.pdf]

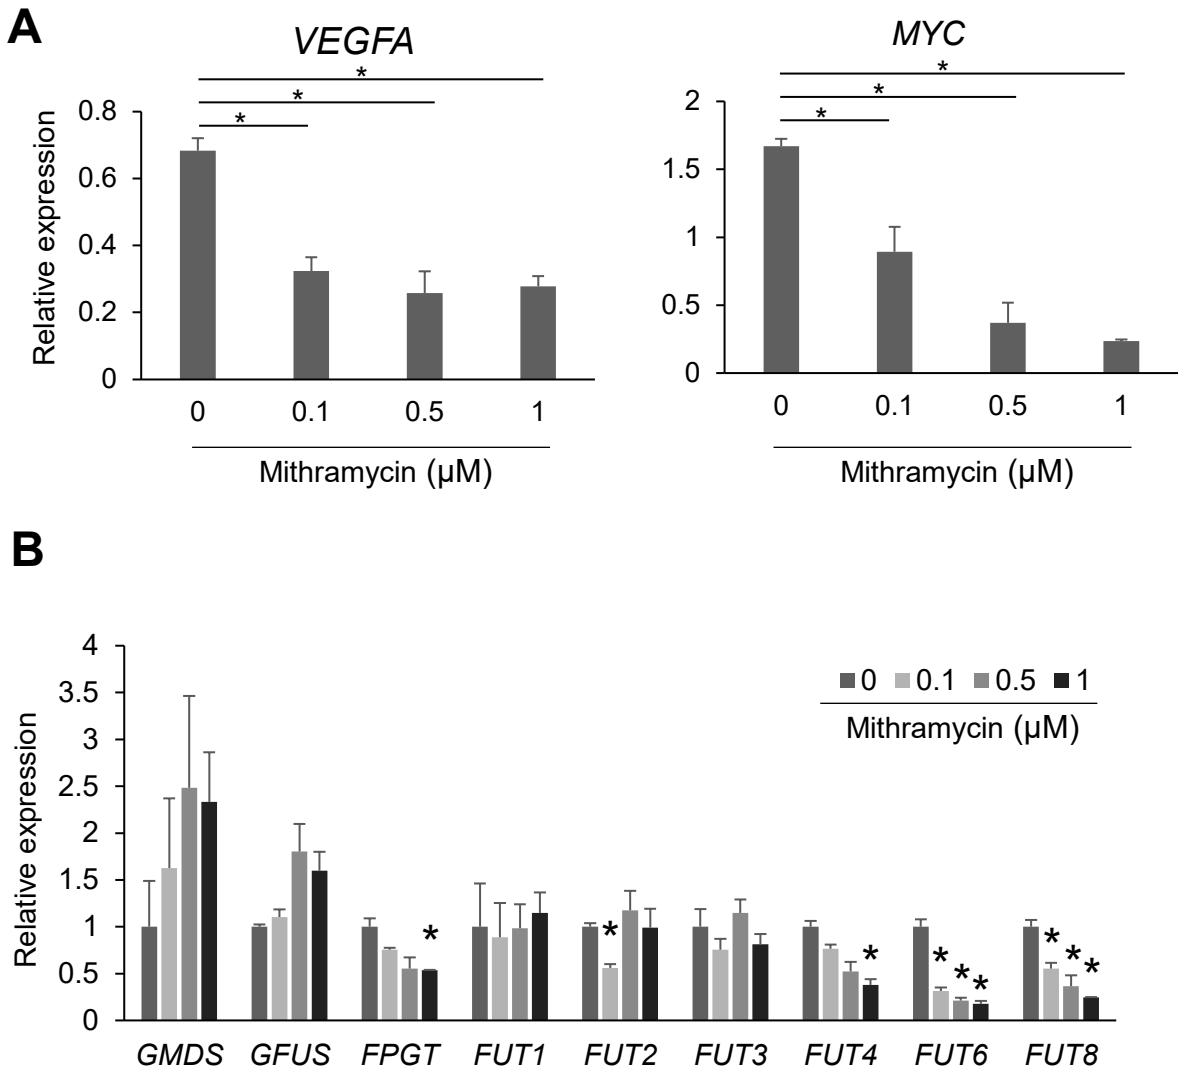

Figure S1

Expression of *VEGFA*, *MYC* (A), and fucosylation-related genes (B) in HepG2 cells treated with mithramycin. *RPL4* was used as the reference gene, and data are shown as the average  $\pm$  S.D. (N = 3 for each condition). Student's t-test with Bonferroni correction, \*  $p < 0.05$ , comparing with 0  $\mu$ M mithramycin in each gene.
